# Supplementary material for: The genetic landscape of ganglioglioma
Source: Acta Neuropathol Commun. 2018 Jun 7;6:47. doi: 10.1186/s40478-018-0551-z (PMC5992851; doi:10.1186/s40478-018-0551-z)
Supplement: Supplementary file 1 — Tables S1-S7. (XLSX 44 kb) [file 40478_2018_551_MOESM1_ESM.xlsx]

## Sheet: Table S1
Supplementary Table 1. List of the 479 genes targeted for sequencing on the UCSF500 Cancer Panel. All coding exons were captured for sequencing from each of these genes, with those highlighted genes also having select intronic or upstream regulatory regions that were captured for sequencing to enable detection of structural variants.
ABL1
ABL2
ACVR1
ACVR1B
AJUBA
AKT1
AKT2
AKT3
ALK
APC
APOBEC3G
AR
ARAF
ARFRP1
ARHGAP35
ARID1A
ARID1B
ARID2
ARID5B
ASH2L
ASXL1
ASXL2
ATF1
ATM
ATR
ATRX
AURKA
AURKB
AXIN1
AXIN2
AXL
BAP1
BARD1
BCL2
BCL2A1
BCL2L1
BCL2L12
BCL2L2
BCL6
BCOR
BCORL1
BLM
BRAF
BRCA1
BRCA2
BRD4
BRIP1
BTG1
BTK
CALR
CARD11
CBFB
CBL
CBLB
CCND1
CCND2
CCND3
CCNE1
CD79A
CD79B
CD274
CDC42
CDC73
CDH1
CDK12
CDK4
CDK6
CDK8
CDKN1A
CDKN1B
CDKN2A
CDKN2B
CDKN2C
CEBPA
CHD1
CHD2
CHD4
CHD5
CHEK1
CHEK2
CIC
CLDN18
CNOT3
COL1A1
COL2A1
CRCT1
CREB1
CREBBP
CRKL
CSF1R
CSF3R
CTCF
CTNNA1
CTNNB1
CUL3
CUX1
CYLD
CXCR4
DCC
DDIT3
DDR2
DDX3X
DDX41
DGKH
DICER1
DIS3
DNAJB1
DNMT3A
DOT1L
DUSP2
DUSP4
DUSP6
DYNC1I1
EBF1
EDNRB
EGFR
EGR1
EIF1AX
ELF3
EMSY
EP300
EPCAM
EPHA2
EPHA3
EPHA5
EPHA7
EPHB1
EPOR
ERBB2
ERBB3
ERBB4
ERCC1
ERCC2
ERG
ERRFI1
ESPL1
ESR1
ESR2
ETS1
ETV6
EWSR1
EZH1
EZH2
FAM123B
FAM46C
FANCA
FANCC
FANCE
FANCF
FANCG
FANCL
FAT1
FAT3
FBXW7
FGF10
FGF14
FGF19
FGF23
FGF3
FGF4
FGF6
FGFR1
FGFR2
FGFR3
FGFR4
FH
FLCN
FLT1
FLT3
FLT4
FOXA1
FOXL2
FOXO1
FOXP1
FRS2
FUBP1
FUS
FYN
GAB2
GATA1
GATA2
GATA3
GLI1
GLI2
GNA11
GNA13
GNAQ
GNAS
GPC3
GPR124
GRIN2A
GRM3
GSK3B
H3F3A
H3F3B
HDAC4
HDAC9
HEY1
HGF
HIF1A
HIST1H3B
HMGA2
HNF1A
HOXB13
HRAS
HSPA2
HSPA5
HSP90AB1
ID3
IDH1
IDH2
IGF1R
IGF2
IGF2R
IKBKE
IKZF1
IKZF2
IKZF3
IL2RB
IL7R
INHBA
INPP4B
IPMK
IRF4
IRS2
JAK1
JAK2
JAK3
JAZF1
KAT6A
KDM5A
KDM5C
KDM6A
KDR
KEAP1
KIT
KLF4
KLHL6
KMT2A
KMT2B
KMT2D
KNSTRN
KRAS
LEF1
LIFR
LRP1B
LZTR1
MALAT1
MAML2
MAP2K1
MAP2K2
MAP2K4
MAP3K1
MAP3K2
MAP3K5
MAP3K7
MAP3K9
MAPK1
MCL1
MDM2
MDM4
MED12
MEF2B
MEN1
MET
MGA
MGMT
MITF
MLH1
MLH3
MPL
MRE11A
MSH2
MSH3
MSH6
MTOR
MUTYH
MYB
MYBL1
MYC
MYCL1
MYCN
MYD88
MYH9
NAV3
NBN
NCKAP5
NCOA2
NCOA3
NCOR1
NF1
NF2
NFE2L2
NFKBIA
NFKBIE
NIPBL
NKX2-1
NOTCH1
NOTCH3
NPM1
NRAS
NSD1
NSD2
NT5C2
NTRK1
NTRK2
NTRK3
NUP93
NUTM1
OR5L1
PAK1
PAK3
PALB2
PARK2
PAX3
PAX5
PAX7
PAX8
PBRM1
PDCD1LG2
PDGFB
PDGFRA
PDGFRB
PDK1
PHF6
PHOX2B
PIK3CA
PIK3CG
PIK3R1
PIK3R2
PLAG1
PLCB4
PMS1
POLD1
POLE
POLQ
POT1
POU3F2
PPM1D
PPP2R1A
PPP6C
PRDM1
PREX2
PRKACA
PRKAG2
PRKAR1A
PRKCA
PRKCH
PRKDC
PTCH1
PTCH2
PTEN
PTK2B
PTPN1
PTPN11
PTPRB
PTPRD
PTPRK
PTPRT
RAC1
RAD21
RAD50
RAD51
RAD51C
RAD51D
RAF1
RARA
RASA1
RASA2
RB1
RBM10
REL
RELA
RET
RHEB
RHOA
RICTOR
RIT1
RNF43
ROBO1
ROS1
RPL10
RPTOR
RRAGC
RRAS
RRAS2
RSPO2
RSPO3
RUNX1
RUNX1T1
SDHB
SDHD
SETBP1
SETD2
SF3B1
SH2B3
SHH
SIN3A
SLIT2
SLITRK6
SMAD2
SMAD3
SMAD4
SMARCA2
SMARCA4
SMARCB1
SMC1A
SMC3
SMO
SNCAIP
SOCS1
SOS1
SOS2
SOX9
SOX10
SOX2
SPEN
SPOP
SPRED1
SPRY1
SPRY2
SPRY4
SPTA1
SRC
SRSF2
SS18
STAG2
STAT3
STAT4
STAT6
STK11
SUFU
SYK
SYNE1
TADA1
TBX3
TCEB1
TCF7L2
TERT
TET2
TFE3
TFEB
TGFBR2
TLR4
TNFAIP3
TNFRSF14
TOP1
TOP2A
TMPRSS2
TP53
TRAF3
TRAF7
TRIM28
TSC1
TSC2
TSHR
TSHZ2
TSHZ3
TSLP
TTYH1
TYK2
U2AF1
USP7
VEGFA
VHL
WISP3
WRN
WT1
XBP1
XPO1
YAP1
YWHAE
ZBTB20
ZFHX3
ZMYM3
ZNF217
ZNF703
ZNFHX4
ZRSR2

## Sheet: Table S2
Supplementary Table 2. Clinical features of the 40 patients with ganglioglioma.
Tumor ID	Pathogenic genetic alterations identified	Patient age at initial diagnosis	Sex	Clinical diagnosis of NF1	Tumor location	Tumor site	Presenting symptoms	Duration of symptoms prior to resection (years)	Extent of resection	Adjuvant therapy	Recurrence or progression	Time to recurrence or progression (years)	Length of follow-up (years)
SF-GG-01	BRAF p.V600E	5	Male	no	Cerebrum	Temporal (mesial)	seizures	2.5	gross total	none	no	-	0.126027
SF-GG-02	BRAF p.V600E	8	Male	no	Cerebrum	Occipital	seizures	5	gross total	none	no	-	0.430137
SF-GG-03	BRAF p.V600E, CDKN2A/B HD, PTEN p.R173C (s)	14	Male	no	Cerebrum	Occipital	seizures	acute onset	gross total	none	yes (pathologic)	1.2274	1.8
SF-GG-04	BRAF p.V600E	11	Male	no	Cerebrum	Temporal	seizures	1	subtotal	none	yes (radiographic)	4.4137	4.4137
SF-GG-05	BRAF p.V600E	12	Female	no	Cerebrum	Temporal	seizures	unknown	unknown	none	yes (pathologic)	1.75616	1.7726
SF-GG-06	BRAF p.V600E	12	Female	no	Cerebrum	Temporal (mesial)	seizures	4	gross total	none	no	-	0.542466
SF-GG-07	BRAF p.V600E	30	Male	no	Cerebrum	Temporal	seizures	0.5	gross total	none	no	-	0.0164384
SF-GG-08	BRAF p.V600E	27	Male	no	Cerebrum	Temporal	seizures	unknown	gross total	none	no	-	0.090411
SF-GG-09	BRAF p.V600E, CDKN2A/B HD	34	Male	no	Cerebrum	Temporal (mesial)	seizures	18	gross total	none	no	-	0.410959
SF-GG-10	BRAF p.V600E	37	Male	no	Cerebrum	Temporal	seizures	0.6	gross total	none	no	-	9.35342
SF-GG-11	BRAF p.V600E, CDKN2A/B HD	25	Female	no	Cerebrum	Temporal (mesial)	seizures	acute onset	gross total	none	no	-	6.67397
SF-GG-12	BRAF p.V600E	41	Male	no	Cerebrum	Temporal	seizures	3	gross total	none	no	-	9.22466
SF-GG-13	BRAF p.V600E	63	Male	no	Cerebrum	Parietal (motor)	seizures	15	gross total	none	no	-	0.00821918
SF-GG-14	BRAF p.V600E	15	Female	no	Cerebellum	Hemisphere and vermis	headaches, nausea	acute onset	gross total	radiation and chemotherapy	no	-	14.811
SF-GG-15	BRAF p.V600E	3	Male	no	Cerebellum	Hemisphere	asymptomatic	N/A	subtotal	chemotherapy	yes (pathologic)	10	10.3863
SF-GG-16	BRAF p.V600E	30	Female	no	Cerebellum	Hemisphere and vermis	nystagmus	acute onset	subtotal	none	no	-	13.8055
SF-GG-17	BRAF p.V600E	8	Male	no	Thalamus	N/A	headache	unknown	biopsy	none	no	-	0.00821918
SF-GG-18	BRAF p.V600E	12	Male	no	Thalamus	N/A	dystonia	acute onset	biopsy	radiation	yes (pathologic)	3.81096	29.2904
SF-GG-19	BRAF p.T599_W604delinsTDG	7	Male	no	Cerebrum	Occipital	seizures	acute onset	gross total	none	no	-	14.1452
SF-GG-20	BRAF p.R506delinsRVLR	19	Female	no	Cerebrum	Temporal (mesial)	seizures	3	gross total	none	no	-	0.243836
SF-GG-21	BRAF p.R506delinsRSTQ	29	Male	no	Cerebrum	Temporal (mesial)	seizures	acute onset	subtotal	none	no	-	1.83562
SF-GG-22	BRAF p.L505delinsLEYLS	23	Female	no	Cerebrum	Temporal	seizures	5	unknown	none	no	-	0
SF-GG-23	BRAF p.R506delinsRVLR	41	Female	no	Cerebrum	Parietal	headaches, visual distortion	unknown	gross total	none	yes (pathologic)	7.8274	8.08493
SF-GG-24	KIAA1549-BRAF fusion	5	Female	no	Spinal cord	Thoracic	asymptomatic	N/A	subtotal	none	no	-	0.227397
SF-GG-25	KIAA1549-BRAF fusion	17	Female	no	Spinal cord	Cervical	leg weakness	acute onset	gross total	none	no	-	4.46027
SF-GG-26	CDC42BPB-BRAF fusion	9	Female	no	Cerebrum	Temporal	seizures	acute onset	subtotal	none	yes (radiographic)	0.608219	2.23562
SF-GG-27	KLHL7-BRAF fusion	8	Female	no	Cerebrum	Occipital	seizures	3	gross total	none	no	-	1.3863
SF-GG-28	ERC2-RAF1 fusion	48	Male	no	Cerebrum	Frontal	seizures	acute onset	gross total	none	no	-	0.534247
SF-GG-29	KRAS p.Q61K	32	Female	no	Cerebrum	Insular	seizures	0.5	gross total	none	no	-	0.00821918
SF-GG-30	KRAS p.Q61K	24	Male	no	Cerebrum	Temporal	seizures	0.7	gross total	none	no	-	0.956164
SF-GG-31	germline NF1 p.Q514frameshift w/ somatic LOH	28	Male	yes	Cerebrum	Temporal	headaches	acute onset	gross total	none	no	-	5.92329
SF-GG-32	FGFR1-TACC1 fusion	35	Male	no	Cerebrum	Frontal	paresthesias	acute onset	subtotal	none	no	-	1.42466
SF-GG-33	FGFR1 p.N546K	59	Female	no	Cerebrum	Temporal	seizures	7	gross total	none	no	-	5.87397
SF-GG-34	FGFR2-KIAA1598 fusion	7	Male	no	Cerebrum	Temporal	seizures	0.6	gross total	none	no	-	5.33699
SF-GG-35	FGFR2-INA fusion	35	Male	no	Cerebrum	Parietal	unknown	N/A	unknown	none	yes (pathologic)	1.37534	9.06849
SF-GG-36	FGFR2 exon 17 splice site mutation	37	Female	no	Cerebrum	Parietal	leg weakness	acute onset	subtotal	none	no	-	7.47671
SF-GG-37	ABL2-GAB2 fusion	2	Male	no	Cerebrum	Frontal	seizures	2	subtotal	none	no	-	0.29589
SF-GG-38	none identified	53	Female	no	Cerebrum	Occipital	asymptomatic	N/A	gross total	none	no	-	0.00547945
SF-GG-39	none identified	0	Female	no	Cerebellum	Vermis	nystagmus	acute onset	gross total	none	no	-	14.8795
SF-GG-40	none identified	10	Male	no	Spinal cord	Cervical	arm weakness	0.8	gross total	none	no	-	14.3068
HD, homozygous deletion. LOH, loss of heterozygosity. (s), subclonal.

## Sheet: Table S3
Supplementary Table 3. Radiographic features of the 40 gangliogliomas.
Patient ID	Pathogenic genetic alterations identified	Laterality	Location	Site	Imaging pattern	Cortically-based	Subcortical white matter involvement	Size (cm)	Multinodular	T2 intensity	T1 intensity	Contrast enhancement	Cystic	Calcifications	Hemorrhage	Abnormalities in adjacent cortex	Well-circumscribed	Overlying bony remodeling
SF-GG-01	BRAF p.V600E	R	Cerebrum	Temporal (mesial)	cystic and solid	yes	present	2.4	no	isointense	isointense	absent	yes	absent	absent	absent	no	absent
SF-GG-02	BRAF p.V600E	R	Cerebrum	Occipital	multicystic	yes	present	2.6	no	hyperintense	hypointense	absent	yes	punctate	absent	present	no	absent
SF-GG-03	BRAF p.V600E, CDKN2A/B HD, PTEN p.R173C (s)	L	Cerebrum	Occipital	No presurgical imaging available for review
SF-GG-04	BRAF p.V600E	L	Cerebrum	Temporal	No presurgical imaging available for review
SF-GG-05	BRAF p.V600E	R	Cerebrum	Temporal	No presurgical imaging available for review
SF-GG-06	BRAF p.V600E	R	Cerebrum	Temporal (mesial)	cystic and solid	yes	present	3.1	no	hyperintense	isointense	absent	yes	absent	absent	absent	no	absent
SF-GG-07	BRAF p.V600E	R	Cerebrum	Temporal	No presurgical imaging available for review
SF-GG-08	BRAF p.V600E	R	Cerebrum	Temporal	No presurgical imaging available for review
SF-GG-09	BRAF p.V600E, CDKN2A/B HD	L	Cerebrum	Temporal (mesial)	solid	yes	absent	2.7	no	hyperintense	hypointense	faint	no	absent	absent	absent	yes	absent
SF-GG-10	BRAF p.V600E	R	Cerebrum	Temporal	No presurgical imaging available for review
SF-GG-11	BRAF p.V600E, CDKN2A/B HD	R	Cerebrum	Temporal (mesial)	cyst with mural nodule	yes	present	3.6	yes	hyperintense	hypointense	nodular	yes	absent	absent	absent	yes	absent
SF-GG-12	BRAF p.V600E	L	Cerebrum	Temporal	cystic and solid	yes	present	2	no	hyperintense	hypointense	faint	yes	absent	absent	absent	no	absent
SF-GG-13	BRAF p.V600E	L	Cerebrum	Parietal (motor)	cyst with mural nodule	no	present	5.9	no	hyperintense	hypointense	nodular	yes	absent	absent	absent	yes	absent
SF-GG-14	BRAF p.V600E	Midline	Cerebellum	Hemisphere and vermis	cystic and solid	yes	absent	2.7	no	hyperintense	hypointense	nodular	yes	absent	absent	absent	no	absent
SF-GG-15	BRAF p.V600E	Midline	Cerebellum	Hemisphere	complex heterogeneous	yes	present	5.7	no	hyperintense	hypointense	nodular	yes	extensive	absent	absent	no	absent
SF-GG-16	BRAF p.V600E	Midline	Cerebellum	Hemisphere and vermis	complex heterogeneous	yes	absent	3.8	no	hyperintense	isointense	nodular	yes	extensive	absent	absent	no	absent
SF-GG-17	BRAF p.V600E	Midline	Thalamus	N/A	complex heterogeneous	yes	absent	3.4	no	hyperintense	isointense	nodular	no	absent	absent	absent	no	absent
SF-GG-18	BRAF p.V600E	Midline	Thalamus	N/A	No presurgical imaging available for review
SF-GG-19	BRAF p.T599_W604delinsTDG	L	Cerebrum	Occipital	cyst with mural nodule	yes	present	3.1	no	hyperintense	hypointense	nodular	yes	punctate	absent	absent	yes	present
SF-GG-20	BRAF p.R506delinsRVLR	R	Cerebrum	Temporal (mesial)	solid	yes	present	1.8	no	hyperintense	isointense	nodular	no	absent	absent	absent	yes	absent
SF-GG-21	BRAF p.R506delinsRSTQ	L	Cerebrum	Temporal (mesial)	cystic and solid	yes	absent	4.7	yes	hyperintense	hypointense	nodular	yes	absent	absent	absent	yes	absent
SF-GG-23	BRAF p.L505delinsLEYLS	L	Cerebrum	Temporal	No presurgical imaging available for review
SF-GG-24	BRAF p.R506delinsRVLR	R	Cerebrum	Parietal	cyst with mural nodule	yes	present	4.2	no	isointense	hypointense	nodular	yes	absent	absent	absent	yes	absent
SF-GG-25	KIAA1549-BRAF fusion	Midline	Spinal cord	Thoracic	solid multinodular	N/A	N/A	7.1	yes	hypointense	isointense	nodular	no	absent	absent	absent	no	absent
SF-GG-26	KIAA1549-BRAF fusion	Midline	Spinal cord	Cervical	cystic and solid	N/A	N/A	7.1	yes	hyperintense	isointense	nodular	yes	absent	present	absent	no	present
SF-GG-27	CDC42BPB-BRAF fusion	R	Cerebrum	Temporal	complex heterogeneous	yes	present	5.4	yes	hyperintense	hypointense	nodular	yes	absent	absent	absent	no	absent
SF-GG-28	KLHL7-BRAF fusion	R	Cerebrum	Occipital	complex heterogeneous	yes	present	7.1	yes	hyperintense	isointense	nodular	yes	absent	present	absent	yes	present
SF-GG-29	ERC2-RAF1 fusion	R	Cerebrum	Frontal	solid	yes	absent	2.5	no	hypointense	isointense	nodular	no	extensive	absent	absent	yes	absent
SF-GG-30	KRAS p.Q61K	L	Cerebrum	Insular	cyst with mural nodule	yes	absent	2.4	no	hyperintense	N/A	nodular	yes	absent	absent	absent	yes	absent
SF-GG-31	KRAS p.Q61K	L	Cerebrum	Temporal	cyst with mural nodule	yes	absent	1.4	no	hyperintense	N/A	nodular	yes	absent	absent	absent	yes	absent
SF-GG-32	germline NF1 p.Q514frameshift w/ somatic LOH	R	Cerebrum	Temporal	cyst with mural nodule	yes	present	4.5	no	hyperintense	hypointense	nodular	yes	absent	present	absent	no	absent
SF-GG-33	FGFR1-TACC1 fusion	L	Cerebrum	Frontal	cystic and solid	yes	present	6.2	yes	hyperintense	isointense	nodular	yes	punctate	present	absent	no	absent
SF-GG-34	FGFR1 p.N546K	R	Cerebrum	Temporal	solid	yes	present	1.3	no	hypointense	isointense	absent	no	extensive	absent	present	yes	absent
SF-GG-35	FGFR2-KIAA1598 fusion	R	Cerebrum	Temporal	multicystic	yes	present	3.3	yes	hyperintense	hypointense	absent	yes	absent	absent	absent	yes	absent
SF-GG-36	FGFR2-INA fusion	L	Cerebrum	Parietal	No presurgical imaging available for review
SF-GG-37	FGFR2 exon 17 splice site mutation	L	Cerebrum	Parietal	complex heterogeneous	yes	present	9.6	yes	hypointense	hypointense	nodular	yes	absent	present	present	no	absent
SF-GG-38	ABL2-GAB2 fusion	L	Cerebrum	Frontal	No presurgical imaging available for review
SF-GG-39	none identified	L	Cerebrum	Occipital	microcystic	yes	present	2.3	no	hyperintense	hypointense	nodular	yes	punctate	absent	absent	no	present
SF-GG-40	none identified	Midline	Cerebellum	Vermis	No presurgical imaging available for review
SF-GG-22	none identified	Midline	Spinal cord	Cervical	cystic and solid	N/A	N/A	16	no	hyperintense	hypointense	nodular	yes	absent	absent	absent	no	present
HD, homozygous deletion. LOH, loss of heterozygosity. (s), subclonal.

## Sheet: Table S4
Supplementary Table 4. Histologic features of the 40 gangliogliomas.
SFID	Pathogenic genetic alterations identified	glial component	eosinophilic granular bodies	Rosenthal fibers	calcifications	myxoid background	CD34-positive ramified cells	mitotic activity	necrosis	microvascular proliferation	perivascular lymphocytes	leptomeningeal spread
SF-GG-01	BRAF p.V600E	astrocytic	absent	absent	present	absent	N/A	absent	absent	absent	present	absent
SF-GG-02	BRAF p.V600E	astrocytic	absent	absent	present	absent	present	absent	absent	absent	present	absent
SF-GG-03	BRAF p.V600E, CDKN2A/B HD, PTEN p.R173C (s)	astrocytic	present	present	present	absent	present	absent	absent	absent	present	absent
SF-GG-04	BRAF p.V600E	astrocytic	present	absent	absent	absent	present	absent	absent	absent	absent	absent
SF-GG-05	BRAF p.V600E	astrocytic	absent	absent	absent	absent	N/A	absent	absent	absent	absent	absent
SF-GG-06	BRAF p.V600E	astrocytic	absent	absent	absent	absent	present	absent	absent	absent	absent	absent
SF-GG-07	BRAF p.V600E	astrocytic	present	absent	absent	absent	absent	absent	absent	absent	prominent	absent
SF-GG-08	BRAF p.V600E	astrocytic	present	absent	absent	absent	present	absent	absent	absent	absent	absent
SF-GG-09	BRAF p.V600E, CDKN2A/B HD	astrocytic	absent	absent	present	absent	N/A	absent	absent	absent	absent	absent
SF-GG-10	BRAF p.V600E	astrocytic	present	absent	absent	absent	N/A	absent	absent	absent	absent	absent
SF-GG-11	BRAF p.V600E, CDKN2A/B HD	astrocytic	present	absent	absent	present	N/A	absent	absent	absent	present	absent
SF-GG-12	BRAF p.V600E	astrocytic	present	absent	absent	absent	present	absent	absent	absent	present	present
SF-GG-13	BRAF p.V600E	astrocytic	present	absent	present	absent	N/A	absent	absent	absent	absent	absent
SF-GG-14	BRAF p.V600E	astrocytic	present	absent	extensive	absent	N/A	absent	absent	absent	present	absent
SF-GG-15	BRAF p.V600E	astrocytic	present	absent	extensive	absent	present	absent	absent	absent	prominent	absent
SF-GG-16	BRAF p.V600E	astrocytic	present	absent	absent	absent	N/A	absent	absent	absent	prominent	absent
SF-GG-17	BRAF p.V600E	astrocytic	present	absent	absent	absent	present	absent	absent	absent	present	absent
SF-GG-18	BRAF p.V600E	astrocytic	present	absent	extensive	absent	N/A	absent	absent	absent	present	absent
SF-GG-19	BRAF p.T599_W604delinsTDG	astrocytic	absent	absent	extensive	absent	N/A	absent	absent	absent	present	present
SF-GG-20	BRAF p.R506delinsRVLR	astrocytic	present	absent	absent	absent	present	absent	absent	absent	present	absent
SF-GG-21	BRAF p.R506delinsRSTQ	astrocytic	present	absent	present	present	N/A	absent	absent	absent	present	absent
SF-GG-22	BRAF p.L505delinsLEYLS	astrocytic	present	absent	absent	absent	present	absent	absent	absent	present	present
SF-GG-23	BRAF p.R506delinsRVLR	astrocytic	present	absent	absent	absent	present	absent	absent	absent	prominent	present
SF-GG-24	KIAA1549-BRAF fusion	astrocytic	absent	absent	absent	absent	present	absent	absent	absent	present	absent
SF-GG-25	KIAA1549-BRAF fusion	astrocytic	present	present	present	absent	present	absent	absent	absent	present	absent
SF-GG-26	CDC42BPB-BRAF fusion	astrocytic	absent	absent	present	absent	N/A	absent	absent	absent	absent	present
SF-GG-27	KLHL7-BRAF fusion	astrocytic	present	absent	present	present	N/A	absent	absent	absent	present	present
SF-GG-28	ERC2-RAF1 fusion	astrocytic	present	absent	extensive	absent	present	absent	absent	absent	prominent	absent
SF-GG-29	KRAS p.Q61K	astrocytic	present	absent	absent	present	N/A	absent	absent	absent	present	absent
SF-GG-30	KRAS p.Q61K	astrocytic	present	present	absent	absent	N/A	absent	absent	absent	absent	absent
SF-GG-31	germline NF1 p.Q514frameshift w/ somatic LOH	astrocytic	absent	present	absent	present	present	absent	absent	absent	absent	present
SF-GG-32	FGFR1-TACC1 fusion	oligodendroglial	absent	present	absent	absent	absent	absent	absent	absent	absent	absent
SF-GG-33	FGFR1 p.N546K	astrocytic	absent	absent	extensive	absent	present	absent	absent	absent	absent	absent
SF-GG-34	FGFR2-KIAA1598 fusion	oligodendroglial	present	absent	absent	absent	N/A	absent	absent	absent	absent	absent
SF-GG-35	FGFR2-INA fusion	oligodendroglial	present	absent	present	absent	N/A	absent	absent	absent	present	present
SF-GG-36	FGFR2 exon 17 splice site mutation	astrocytic	present	absent	extensive	absent	N/A	absent	absent	absent	absent	absent
SF-GG-37	ABL2-GAB2 fusion	astrocytic	absent	absent	absent	absent	absent	absent	absent	absent	absent	absent
SF-GG-38	none identified	astrocytic	present	absent	extensive	absent	N/A	absent	absent	absent	absent	absent
SF-GG-39	none identified	astrocytic	absent	absent	absent	present	N/A	absent	absent	absent	absent	absent
SF-GG-40	none identified	astrocytic	present	present	present	absent	N/A	absent	absent	absent	present	absent
HD, homozygous deletion. LOH, loss of heterozygosity. (s), subclonal. N/A, not assessed.

## Sheet: Table S5
Supplementary Table 5. Pathogenic single nucleotide variants and small insertions/deletions identified in the 40 gangliogliomas.
Tumor ID	Chromosome	Position	Reference	Alternate	Gene	cDNA variant	Amino acid variant	Transcript ID	Tumor coverage	Tumor mutant allele frequency	Exonic function
SF-GG-01	chr7	140453136	A	T	BRAF	c.1799T>A	p.V600E	NM_004333	716	0.27	nonsynonymous SNV
SF-GG-02	chr7	140453136	A	T	BRAF	c.1799T>A	p.V600E	NM_004333	729	0.2	nonsynonymous SNV
SF-GG-03	chr7	140453136	A	T	BRAF	c.1799T>A	p.V600E	NM_004333	710	0.3	nonsynonymous SNV
	chr10	89711899	C	T	PTEN	c.517C>T	p.R173C	NM_000314	437	0.03	nonsynonymous SNV
SF-GG-04	chr7	140453136	A	T	BRAF	c.1799T>A	p.V600E	NM_004333	352	0.12	nonsynonymous SNV
SF-GG-05	chr7	140453136	A	T	BRAF	c.1799T>A	p.V600E	NM_004333	881	0.26	nonsynonymous SNV
SF-GG-06	chr7	140453136	A	T	BRAF	c.1799T>A	p.V600E	NM_004333	684	0.05	nonsynonymous SNV
SF-GG-07	chr7	140453136	A	T	BRAF	c.1799T>A	p.V600E	NM_004333	648	0.21	nonsynonymous SNV
SF-GG-08	chr7	140453136	A	T	BRAF	c.1799T>A	p.V600E	NM_004333	559	0.44	nonsynonymous SNV
SF-GG-09	chr7	140453136	A	T	BRAF	c.1799T>A	p.V600E	NM_004333	505	0.3	nonsynonymous SNV
SF-GG-10	chr7	140453136	A	T	BRAF	c.1799T>A	p.V600E	NM_004333	370	0.06	nonsynonymous SNV
SF-GG-11	chr7	140453136	A	T	BRAF	c.1799T>A	p.V600E	NM_004333	796	24%	nonsynonymous SNV
SF-GG-12	chr7	140453136	A	T	BRAF	c.1799T>A	p.V600E	NM_004333	739	0.21	nonsynonymous SNV
SF-GG-13	chr7	140453136	A	T	BRAF	c.1799T>A	p.V600E	NM_004333	777	0.28	nonsynonymous SNV
SF-GG-14	chr7	140453136	A	T	BRAF	c.1799T>A	p.V600E	NM_004333	638	0.16	nonsynonymous SNV
SF-GG-15	chr7	140453136	A	T	BRAF	c.1799T>A	p.V600E	NM_004333	779	0.37	nonsynonymous SNV
SF-GG-16	chr7	140453136	A	T	BRAF	c.1799T>A	p.V600E	NM_004333	744	0.03	nonsynonymous SNV
SF-GG-17	chr7	140453136	A	T	BRAF	c.1799T>A	p.V600E	NM_004333	684	0.17	nonsynonymous SNV
SF-GG-18	chr7	140453136	A	T	BRAF	c.1799T>A	p.V600E	NM_004333	425	0.01	nonsynonymous SNV
SF-GG-19	chr7	140453123	CCATCGAGATTTCACT	CCCATCA	BRAF	c.1797_1812delinsTGATGGG	p.T599_W604delinsTDG	NM_004333	659	0.01	nonframeshift indel
SF-GG-20	chr7	140477788	CA	TACCTGAGTAC	BRAF	c.1517+1_1517+3delinsGGTACTCAGGTA	p.R506delinsRVLR	NM_004333	721	0.43	nonframeshift indel
SF-GG-21	chr7	140477790	C	CCTGAGTACT	BRAF	c.1517delinsGAGTACTCAG	p.R506delinsRSTQ	NM_004333	659	0.19	nonframeshift indel
SF-GG-22	chr7	140477793	G	ACTCAGGTACTCA	BRAF	c.1515delinsTGAGTACCTGAGT	p.L505delinsLEYLS	NM_004333	507	0.15	nonframeshift indel
SF-GG-23	chr7	140477789	A	ACCTGAGTAC	BRAF	c.1517+1delinsGGTACTCAGG	p.R506delinsRVLR	NM_004333	527	0.12	nonframeshift indel
SF-GG-24	-	-	-	-	-	-	-	-	-	-	-
SF-GG-25	-	-	-	-	-	-	-	-	-	-	-
SF-GG-26	-	-	-	-	-	-	-	-	-	-	-
SF-GG-27	-	-	-	-	-	-	-	-	-	-	-
SF-GG-28	-	-	-	-	-	-	-	-	-	-	-
SF-GG-29	chr12	25380277	GA	TG	KRAS	c.180_181delinsCA	p.Q61K	NM_004985	503	29%	nonframeshift substitution
SF-GG-30	chr12	25380277	GA	TT	KRAS	c.180_181delinsAA	p.Q61K	NM_004985	565	0.2	nonframeshift substitution
SF-GG-31	chr17	29546035	CAG	C	NF1	c.1541_1542del	p.Q514fs	NM_001042492	865	83%	frameshift deletion
SF-GG-32	-	-	-	-	-	-	-	-	-	-	-
SF-GG-33	chr8	38274849	G	T	FGFR1	c.1638C>A	p.N546K	NM_023110	506	0.03	nonsynonymous SNV
SF-GG-34	-	-	-	-	-	-	-	-	-	-	-
SF-GG-35	-	-	-	-	-	-	-	-	-	-	-
SF-GG-36	chr10	123243319	T	A	FGFR2	c.2199-2A>T	p.L733fs	NM_022970	163	0.04	splice site SNV
SF-GG-37	-	-	-	-	-	-	-	-	-	-	-
SF-GG-38	-	-	-	-	-	-	-	-	-	-	-
SF-GG-39	-	-	-	-	-	-	-	-	-	-	-
SF-GG-40	-	-	-	-	-	-	-	-	-	-	-

## Sheet: Table S6
Supplementary Table 6. Structural variants identified in the 40 gangliogliomas.
			N-terminal gene						C-terminal gene
Tumor ID	Structural variant	Fusion type	Gene	Chromosome	Breakpoint position	Transcript ID	Fused exons	Fused amino acids	Gene	Chromosome	Breakpoint position	Transcript ID	Fused exons	Fused amino acids	Sequencing reads over fusion junction
SF-GG-24	duplication	in-frame	KIAA1549	chr7	138567570	NM_001164665	1-10	1-1344	BRAF	chr7	140489613	NM_004333	9-18	381-766	17
SF-GG-25	duplication	in-frame	KIAA1549	chr7	138547120	NM_001164665	1-15	1-1643	BRAF	chr7	140491459	NM_004333	9-18	381-766	4
SF-GG-26	translocation	in-frame	CDC42BPB	chr14	103402899	NM_006035	1-36	1-1668	BRAF	chr7	140487690	NM_004333	9-18	381-766	123
SF-GG-27	inversion	in-frame	KLHL7	chr7	23165417	NM_001031710	1-4	1-147	BRAF	chr7	140486506	NM_004333	10-18	394-766	58
SF-GG-28	deletion	in-frame	ERC2	chr3	56056946	NM_015576	1-7	1-547	RAF1	chr3	12643599	NM_002880	8-17	279-648	173
SF-GG-32	inversion	in-frame	FGFR1	chr8	38271426	NM_001174067	1-18	1-795	TACC1	chr8	38692943	NM_006283	7-13	572-805	179
SF-GG-34	deletion	in-frame	FGFR2	chr10	123242112	NM_022970	1-17	1-768	KIAA1598	chr10	118711224	NM_001127211	7-17	179-631	86
SF-GG-35	inversion	in-frame	FGFR2	chr10	123241718	NM_022970	1-17	1-768	INA	chr10	105042697	NM_032727	2-3	356-499	168
SF-GG-37	translocation	in-frame	ABL2	chr1	179079760	NM_007314	1-10	1-550	GAB2	chr11	77936931	NM_080491	5-10	404-676	23

## Sheet: Table S7
Supplementary Table 7. Chromosomal copy number alterations identified in the 40 gangliogliomas.
Tumor ID	Chromosomal gains	Chromosomal losses	Focal amplifications	Focal deep deletions	Copy-neutral loss of heterozygosity
SF-GG-01	none	none	none	none	none
SF-GG-02	none	none	none	none	none
SF-GG-03	distal 3q	9	none	CDKN2A/B (9p21)	none
SF-GG-04	none	none	none	none	none
SF-GG-05	7, 9, 12	none	none	none	none
SF-GG-06	none	none	none	none	none
SF-GG-07	none	1p, 16q	none	none	none
SF-GG-08	5, 7, 8, 11, 12, 15, 16, 19, 20, 21	none	none	none	none
SF-GG-09	none	9	none	CDKN2A/B (9p21)	none
SF-GG-10	5	none	none	none	none
SF-GG-11	none	1p, 9	none	CDKN2A/B (9p21)	none
SF-GG-12	none	none	none	none	none
SF-GG-13	19p	1p	none	none	none
SF-GG-14	none	none	none	none	none
SF-GG-15	none	none	none	none	none
SF-GG-16	none	none	none	none	none
SF-GG-17	none	none	none	none	none
SF-GG-18	none	none	none	none	none
SF-GG-19	none	none	none	none	none
SF-GG-20	none	none	none	none	none
SF-GG-21	5, 6, 7, 11, 18	none	none	none	none
SF-GG-22	none	none	none	none	none
SF-GG-23	none	none	none	none	none
SF-GG-24	none	none	none	none	none
SF-GG-25	none	none	none	none	none
SF-GG-26	none	interstitial 17p	none	none	none
SF-GG-27	7	none	none	none	none
SF-GG-28	3, 5, 7	interstitial 3p	none	none	none
SF-GG-29	none	none	none	none	none
SF-GG-30	none	none	none	none	none
SF-GG-31	4, 5, 7, 8, 9, 12, 15, 22	17p, 18p	none	none	1, 2, 3, 6, 10, 11, 13, 14, 16, 17q, 18q, 19, 20, 21
SF-GG-32	none	none	none	none	none
SF-GG-33	none	none	none	none	none
SF-GG-34	none	none	none	none	none
SF-GG-35	none	multiple segmental losses involving 10	none	none	none
SF-GG-36	none	none	none	none	none
SF-GG-37	none	none	none	none	none
SF-GG-38	none	none	none	none	none
SF-GG-39	none	none	none	none	none
SF-GG-40	none	none	none	none	none
